# Supplementary material for: Karyotype of the Blastocoel Fluid Derived by Laser-Assisted Hatching Demonstrates a Low Agreement With the Trophectoderm
Source: Front Physiol. 2022 Jun 8;13:827568. doi: 10.3389/fphys.2022.827568 (PMC9216213; doi:10.3389/fphys.2022.827568)
Supplement: Supplementary file 1 [file Table_1.XLSX]

## Sheet: Sheet1
	N0. report	No. sample	bar code	BF	library concentration ng/ul
	YKSH_NICS_171010_02A_01	YN_1_A	02A171010AN01M101	46,XY,+X(×2,mos*),-Y(×0,mos*)	0.656
		YN_2_A	02A171010AN01M102	N/A	0.606
		YN_1_B	02A171010AN01B201	N/A	0.306
		YY_1_A	02A171010AN01M103	N/A	0.524
		YY_2_A	02A171010AN01M104	N/A	1.06
		YY_3_A	02A171010AN01M105	multiple chromosome aneuploidies,+2q(q21.3→q32.1,~55M,×6),-3(p11.1→qter,~108M,×1),-3(p11.1→qter,~108M,×1),-11(pter→q14.1,~84M,×1),+18(×3),+22(×4),…	1.89
		YY_4_A	02A171010AN01M106	46,XN	2.8
		YY_5_A	02A171010AN01M107	N/A	0.56
		YY_6_A	02A171010AN01M108	44,XN,-2(×1),-13q(q13.3→q31.3,~58M,×1,mos*),-14(pter→q31.3,~69M,×1,mos*),-16(×0,mos*)	1.46
		YY_1_B	02A171010AN01B202		0.336
	YKSH_NICS_170702_02A_01_TEST	A1-2017-6-13	02A170702AN01M001	multiple chromosome aneuploidies,-4(×1),+5(pter→q23.2,~121M,×3,mos*),+6(p23→qter,~149M,×3,mos*),+7(p14.3→qter,~123M,×3,mos*),-12(p12.1→qter,~107M,×1),…	6.18
		A2-2017-6-13	02A170702AN01M002	multiple chromosome aneuploidies, -1(pter→q25.2,~170M,×1,mos*),+2(p24.1→q14.1,~98M,×3,mos*),-3p(pter→p12.3,~80M,×1,mos*),-3(p12.1→qter,~113M,×1,mos*),+4(×3,mos*),…	5.94
	YKSH_NICS_171121_02A_01	LM_1_A	K05_02A171121AN01M101	46,XN	23
		LM_2_A	K06_02A171121AN01M102	45,XN,-5(×1)	24.4
		LM_3_A	K07_02A171121AN01M103	multiple chromosome aneuploidies, +1(×3),-5(×1,mos*),+8(×3,mos*),-13(×1,mos*),+15(×3),…	10.8
	YKSH_NICS_171118_02A_01	XLJ_1_A	02A171118AN01M101	multiple chromosome aneuploidies, -5(×1,mos*),+15(×3,mos*),+17(×3,mos*),+18(pter→q22.1,~64M,×3,mos*),-19(×1,mos*),..	5.08
		XLJ_2_A	02A171118AN01M102	46, XY,-Y(×0,mos*)	0.578
		XLJ_3_A	02A171118AN01M103	multiple chromosome aneuploidies, +1(×3,mos*),-2(×1),+8(pter→q21.12,~79M,×3,mos*),+11(×3),+15(×3),…	1.67
		LJX_1_A	02A171118AN01M104	46,XN,+3q(q26.1→qter,~33M, ×3,mos*,~50%)	0.748
	YKSH_NICS_171104_02A_01	ZJY_1_A	02A171104AN01M101	46,XN	26.6
		ZJY_2_A	02A171104AN01M102	46, XY,+X(×2,mos*),-Y(×0,mos*)	34.4
	YKSH_NICS_171030_02A_01_CL	WMY_1_A	02A171030AN01M101	multiple chromosome aneuploidies, -2(×1,mos*),-11(×1,mos*),+14(×3,mos*),-15(×1,mos*),-18(×1),…	49.2
		WMY_2_ A	02A171030AN01M102	46,XY,+X(×2,mos*),-Y(×0,mos*),+16(×3,mos*)	42.4
	YKSH_NICS_170509_02A_01_CL	1_B_1	02A170509011_B_1_M	multiple chromosome aneuploidies, +4(×3,mos*),+5(×3,mos*),-6(p21.2→qter,~134M,×1,mos*),+7(×3,mos*),-16(×1,mos*),…	11.2
		1_B_2	02A170509011_B_2_M	46,XN,-X(pter→q12,~66M,×1,mos*),-4(pter→q22.1,~91M,×1,mos*),-4q(q22.3→qter,~95M,×1,mos*),+10(pter→q21.2,~62M,×3,mos*)	4.32
		1_B_3	02A170509011_B_3_M	N/A	1.02
	YKSH_NICS_170307_02A_02_CL	1_1_A	02A170307021_1_A_M1	N/A	0.73
		1_2_A	02A170307021_2_A_M1	N/A	0.25
		1_3_A	02A170307021_3_A_M1	46,XN,-1q(q33.1→qter,~49M,×1,mos*),+2(×3,mos*),-11q(q22.1→qter,~37M,×1) ,-18(pter→q12.2,~38M,×1)	6.35
		1_4_A	02A170307021_4_A_M1	N/A	0.336
		1_5_A	02A170307021_5_A_M1	N/A	0.502
	YKSH_NICS_170307_02A_01_CL	2_1_A	02A170307012_1_A_M1	N/A	0.625
		2_2_A	02A170307012_2_A_M1	N/A	0.22
		2_3_A	02A170307012_3_A_M1	N/A	0.36
		2_4_A	02A170307012_4_A_M1	N/A	0.431
	YKSH_NICS_171024_02A_02	YK_1_A	02A171024AN02M108	46,XN,+6(pter→q22.3,~123M,×3,mos*),+6q(q22.1→q25.2,~32M, ×3)	4.98
		CXF_1_A	02A171024AN02M109	multiple chromosome aneuploidies, -1q(q23.3→qter,~82M,×1,mos*),+4(pter→q13.1,~67M,×3,mos*),+5q(q13.2→q33.3,~89M,×3,mos*),+17(×3), +22(×3)…	3.3
		CXF_2_A	02A171024AN02M110	multiple chromosome aneuploidies, -7(q35→qter,~15M, ×1),+11(×3,mos*),-15(×1,mos*),+17(×3,mos*),+18(×3,mos*)	2.52
		CXF_3_A	02A171024AN02M111	46,XN,+20(×3,mos*,~70%)	7.54
		XJ_1_A	02A171024AN02M112	multiple chromosome aneuploidies, -1p(p33→p13.1,~71M,×1,mos*),+6q(q15→qter,~83M,×3),-9(p21.1→qter,~104M,×1,mos*),+10q(q21.3→qter,~70M,×3,mos*),+11(pter→q22.1,~101M,×3,mos*),…	11.4
		WYX_1_A	02A171024AN02M113	多条染色体异常;-1(×1,mos*),+3(×3),-6(×1,mos*),-7(×1,mos*),+9(×3)	2.3
		WYX_2_A	02A171024AN02M114	46,XY,+X(×2,mos*),-Y(×0,mos*),+6(pter→q16.1,~97M,×3,mos*)	2.46
	YKSH_NICS_180425_02A_01_CL	JWW_3_M	02A180425AT02M001	N/A	4.08
		WY_3_M	02A180425AT02M002	46,XN,-9(×1,mos*,~40%)	32.6
		MLL_3_M	02A180425AT02M003	N/A	4.64
		LMR_3_M	02A180425AT02M004	multiple chromosome aneuploidies, +2(×3),+6(×3),+8(×3),+12(p12.1→qter,~105M,×3) ,-18(×1),…	28
	YKSH_NICS_180516_02A_01_CL	XM_3_M	02A180516AT01M001	N/A	0.852
		LHX_3_M	02A180516AT01M002	46,XN	30.4
		FXM_3_M	02A180516AT01M003	N/A	2.52
	YKSH_NICS_180417_02A_01_CL	LTT_3_M	02A180417AT01M001	46,XN,+4(×3,mos*),-8(×1,mos*)	27.6
		XJN_3_M	02A180417AT01M002	multiple chromosome aneuploidies, +5(p14.1→qter,~147M,×3,mos*),+10(×3,mos*),+13(pter→q21.33,~51M,×3,mos*),-17(×1,mos*),+19(×3,mos*),…	19.8
		HYY_3_M	02A180417AT01M003	46,XN,-9q(q21.13→qter,~65M,×1)	21.6
		LC_3_M	02A180417AT01M004	N/A	5.68
	YKSH_NICS_180410_02A_01_CL	JHY_3_M	02A180410AT01M001	47,XXY,+X(×2),-Y(×0,mos*),-9(×1,mos*)	12.7
		LXC_3_M	02A180410AT01M002	multiple chromosome aneuploidies, +2q(q22.1→qter,~97M,×3,mos*),+6(p22.3→q21,~85M,×3,mos*),+7(p14.3→q11.23,~38M,×3),+12(pter→q21.31,~82M,×3,mos*),+15(pter→q21.2,~27M, ×3),…	53.2
		LJ_3_M	02A180410AT01M003	N/A	8.02
